# Supplementary material for: The HBV Drug Entecavir — Effects on HIV-1 Replication and Resistance
Source: Atypon-hosted journal article supplement (doi:10.1056/nejmoa067710), 2007-06-20
Supplement: nejm_mcmahon_2614sa1.pdf [file nejm_mcmahon_2614sa1.pdf]

## Supplementary Appendix

This appendix has been provided by the authors to give readers additional information about their work.

Supplement to: McMahon MA, Jilek BL, Brennan TP, et al. The HBV drug entecavir — effects on HIV-1 replication and resistance. *N Engl J Med* 2007;356:2614-21.

## Supplemental Methods

### *Real Time PCR Primers*

The following set of primers and probes were used for Real Time PCR amplification:

5' early, GCTAACTAGGGAACCCACTGCTT; 3' early,  
CAACAGACGGGCACACACTACT; early probe,  
AGCCTCAATAAAGCTTGCCTTGAGTGCTTC;

5' intermediate, GGTGCGAGAGCGTCGGTATTAAG; 3' intermediate,  
AGCTCCCTGCTTGCCCATA; intermediate probe,  
AAAATTCGGTTAAGGCCAGGGGAAAGAA;

5' late, GAGTCCTGCGTCGAGAGATC, 3' late, TGTGTGCCCGTCTGTTGTGT; late  
probe, CAGTGGCGCCCGAACAGGGA.
